# Supplementary material for: Dissecting the Functional Role of the N-Terminal Domain of the Human Small Heat Shock Protein HSPB6
Source: PubMed Central journal article supplement (PMC4144951; doi:10.1371/journal.pone.0105892), 2014-08-26
Supplement: pone.0105892.s007.pdf [file pone.0105892.s007.pdf]

| Construct | Direction | Primer (5' to 3')                        |
|-----------|-----------|------------------------------------------|
| ΔN        | Forward   | ACCGCGAACAGATTGGTGGCGGCCACTTTTCGGTGCTGCT |
|           | Reverse   | CTTCTCGAGGAGAGTTTAGATTACTTGGCTGCGGCTGGCG |
| ΔN10      | Forward   | TGGCTGCGCCGCGCCTCG                       |
|           | Reverse   | CGAGGCGCGGCGCAGCCAGCCACCAATCTGTTTCGCGGT  |
| ΔN11      | Forward   | CACCGCGAACAGATTGGTGGCCTGCGCCGCGCCTCGGC   |
|           | Reverse   | CTTCTCGAGGAGAGTTTAGATTACTTGGCTGCGGCTGGCG |
| Δ11-20    | Forward   | GGACTTTTCGGCGCCCGGAC                     |
|           | Reverse   | CGTCCGGGCGCCGAAAGTCCAGACGGCTGCACAGGCACAG |
| Δ21-30    | Forward   | CAGCGCTTCGGCGAGGGG                       |
|           | Reverse   | CCCCTCGCCGAAGCGCTGGGGCAACGGGGCCGAGGC     |
| Δ31-40    | Forward   | GAGCTGGCTGCGCTCTGCC                      |
|           | Reverse   | GGCAGAGCGCAGCCAGCTCGTCAAAGAGGCGTCCGGGGC  |
| Δ41-50    | Forward   | GCCCCCTACTACCTGCGCG                      |
|           | Reverse   | CGCGCAGGTAGTAGGGGGCGGCCTCCAGCAGCCCCCTC   |
| Δ51-60    | Forward   | GCGCTGCCCCGTGCCCCAG                      |
|           | Reverse   | CTGGGCGACGGGCAGCGCGAGCGTGGTGGGGCAGAGC    |
| Δ61-70    | Forward   | CCCGGCCACTTTTCGGTGC                      |
|           | Reverse   | GCACCGAAAAGTGGCCGGGCACGCTGGGTGCGCGCAG    |
| Δ31-35    | Forward   | GGGCTGCTGGAGGCCGAG                       |
|           | Reverse   | CTCGGCCTCCAGCAGCCCGTCAAAGAGGCGTCCGGGC    |
| Δ36-40    | Forward   | GAGCTGGCTGCGCTCTGCC                      |
|           | Reverse   | GGCAGAGCGCAGCCAGCTCCTCGCCGAAGCGCTGGTCA   |
| Q31A      | Forward   | CCTCTTTGACGCGCGCTTCGGC                   |
|           | Reverse   | GCCGAAGCGCGCGTCAAAGAGG                   |
| Q31L      | Forward   | CTCTTTGACCTGCGCTTCGGC                    |
|           | Reverse   | GCCGAAGCGCAGGTCAAAGAG                    |
| F33A      | Forward   | GACCAGCGCGCCGGCGAGGG                     |
|           | Reverse   | CCCTCGCCGGCGCGCTGGTC                     |
| F33Y      | Forward   | GACCAGCGCTACGGCGAGGG                     |
|           | Reverse   | CCCTCGCCGTAGCGCTGGTC                     |
